# Supplementary material for: Enhancing CO2-facilitated transport in PVAm membranes through the synergistic effect of porous molybdenum disulfide and mobilizable sulfonic groups
Source: Royal Society of Chemistry journal article supplement (doi:10.1039/d4ta07302a), 2024-12-06
Supplement: d4ta07302a1.pdf [file d4ta07302a1.pdf]

## Supporting Information

### **Enhancing CO<sub>2</sub>-facilitated transport of PVAm membrane by the synergistic effect of porous molybdenum disulfide and mobilizable sulfonic groups**

Yonghong Wang, <sup>\*a</sup> Fangni Hu, <sup>a</sup> Xinru Zhang, <sup>\*a</sup>, Jinping Li<sup>a</sup> and Shouliang Yi<sup>\*b</sup>

<sup>a</sup> College of Chemistry and Chemical Engineering, Taiyuan University of Technology, Taiyuan, 030024, Shanxi, China

<sup>b</sup> Department of Civil and Environmental Engineering, University of Pittsburgh, 3700 O'Hara St., Pittsburgh, PA 15261, USA

\*Corresponding Authors. E-mail addresses: wangyonghong666@163.com (Dr. Yonghong Wang); zhangxinru@tyut.edu.cn (Dr. Xinru Zhang); shouliang.yi@pitt.edu (Prof. Shouliang Yi).

## S2.1. Materials

Polyvinylamine (PVAm, solid content of 18 wt%, Mw=60 KDa) was bought from BASF (Germany), and polyether-block-amide (Pebax-1657) was supplied by Arkema Company (France). Ammonium molybdate tetrahydrate ((NH<sub>4</sub>)<sub>6</sub>Mo<sub>7</sub>O<sub>24</sub>·4H<sub>2</sub>O, 99%) and L-cysteine (L-Cys, 99%) were supplied by Shanghai Macklin Biochemical Co., Ltd. Polydimethylsiloxane (PDMS, 50000 mPa s) and ethyl orthosilicate (TEOS) were supplied by Jinan Xingfeilong Co., Ltd. Hydrochloric acid (HCl, 36-38 wt%) was supplied by Sinopharm Chemical Reagent Co., Ltd. Sodium hydroxide (NaOH, 96%) was supplied from Tianjin Guangfu Fine Chemical Research Institute (Tianjin, China). Thiourea (99%) and ethanol (99.7%) were supplied from Tianjin Tianli Chemical Reagent Company Co., Ltd. Sodium 3-mercapto-1-propanesulfonate (MPS, 90%) was supplied by Aladdin. Dibutyltin dilaurate (DBD, tin content: 17-19%) was purchased from Chengdu Kelong Chemical Reagent Factory. Polyvinyl alcohol (PVA, 1799) and ethanol were purchased from Sinopharm Chemical Reagent Co., Ltd. N-hexane (98%) was purchased from Tianjin Tianli Chemical Reagent Co., Ltd. The polysulfone (PSf) ultrafiltration membrane (the cut-off molecular weight of 45000) was bought from Jiuzhang Membrane Technology Co., Ltd. N<sub>2</sub> and CO<sub>2</sub> with purities of 99.999%, and the mixed gas (CO<sub>2</sub>/N<sub>2</sub> = 15/85 vol%) were provided by Taiyuan Anxuhongyun Technology Development Co., Ltd. All the reagents were chemical pure and used directly without purification.

## S2.2. Modification of PSf ultrafiltration membrane (mPSf)

PDMS, TEOS as the cross-linking agent, and DBD as the catalyst were dissolved in n-hexane with the mass ratio of 5:4:4, and then magnetically stirred for 30 min at 30 °C, and as-prepared pre-crosslinked PDMS solution was coated on the PSf ultrafiltration membrane with

a wet film thickness of 50  $\mu\text{m}$ , and then placed at 30  $^{\circ}\text{C}$  and 40% RH for 4 h to prevent the leakage and blocking pore of casting solution in mixed matrix composite membranes.<sup>1</sup> For further hydrophilic modification, 0.1 wt% PVA solution was coated on above as-prepared support with a wet film thickness of 50  $\mu\text{m}$ , and then placed at 30  $^{\circ}\text{C}$  and 40% RH for 4 h. The as-obtained membrane was referred to as modified PSf ultrafiltration membrane (mPSf). mPSf membrane not only functions as a porous support to improve the mechanical properties of MMCMs, but also has a  $\text{CO}_2$  permeance of 400 GPU with a  $\text{CO}_2/\text{N}_2$  selectivity of 5.5.

### **S2.3. Preparation of Pebax-based MMCMs**

By contrast, Pebax-based MMMs were prepared by the similar method to that of PVAm-based MMCMs except for coating solution, and the preparation of this solution was as follows. Pebax pellets were first dissolved in mixed solvent (ethanol/water=70/30 wt%) under mechanical stirring at 80  $^{\circ}\text{C}$  for 4 h to acquire 8 wt% polymer solution. Subsequently, fillers were dispersed into mixed solvent (ethanol/water=70/30 wt%) under ultrasonication at 25  $^{\circ}\text{C}$  for 1.5 h to get a uniform suspension, which was then added dropwise to 8 wt% Pebax solution. Next, it was sonicated for 1 h and then magnetically stirred for 2 h, which was repeated with 3 times to get 2.5 wt% mixed solution. Moreover, the pristine Pebax membrane and Pebax-based MMMs incorporating with  $\text{MoS}_2$ ,  $\text{MoS}_2(\text{L})$ ,  $\text{SO}_3\text{H-MoS}_2(\text{L})$ ,  $\text{MPS/MoS}_2(\text{L})$  and  $\text{S-MoS}_2(\text{L})$  were prepared by a solution-casting method, which was represented as Pebax, Pebax/ $\text{MoS}_2$ , Pebax/ $\text{MoS}_2(\text{L})$ , Pebax/ $\text{SO}_3\text{H-MoS}_2(\text{L})$ , Pebax/ $\text{MPS/MoS}_2(\text{L})$  and Pebax/ $\text{S-MoS}_2(\text{L})$  respectively. Besides, corresponding free-supporting membranes were prepared by putting 4 wt% of casting solution into a Teflon petri dish for 12 h at room temperature, which were dried in a vacuum oven at 50  $^{\circ}\text{C}$  for another 12 h to get MMMs.

## S2.4. Measurement of total water, free water and bound water for Pebax-based MMMs

The total water, free water and bound water of the membranes were measured according to the literature.<sup>2, 3</sup> After gas permeation test, the mass of Pebax/S-MoS<sub>2</sub>(L) MMMs was immediately weighted and recorded as  $m_2$ , mg. Then, in order to remove the free water in the membrane, the wet membrane was dried in a vacuum oven at 100 °C for 6 h, and the membrane was weighed again and recorded as  $m_1$ , mg. Subsequently, the membrane continued to be dried in a vacuum oven at 150 °C for 6 h to remove bound water, and the membrane was weighed immediately and recorded as  $m_0$ , mg. The total water content ( $W_t$ , %), the free water content ( $W_f$ , %), and the bound water content ( $W_b$ , %) can be calculated by following equation 1-3 respectively.

$$W_t = \frac{(m_2 - m_0)}{m_0} \times 100\% \quad (1)$$

$$W_f = \frac{(m_2 - m_1)}{m_0} \times 100\% \quad (2)$$

$$W_b = \frac{(m_1 - m_0)}{m_0} \times 100\% \quad (3)$$

## S2.5. Characterization of filler and the membranes

UV-vis adsorption spectra of hybrids were collected with a GENESYS 180 UV–Visible Spectrophotometer (Thermo Scientific, USA) in the wavelength range of 700–190 nm with a resolution of 6 nm. Fourier-transform infrared spectra (FTIR) and attenuated total reflection Fourier-transform infrared spectra (ATR-FTIR) of filler and membranes were collected with an ALPHA II spectrometer (Bruker, Germany) in the wavelength range of 4000–400 cm<sup>-1</sup> with a

resolution of  $4^\circ \text{ cm}^{-1}$ . X-ray diffraction (XRD) patterns of all samples were recorded using a D8 X-ray diffractometer (Bruker, Germany) at a scanning rate of  $4^\circ \text{ min}^{-1}$  over the  $2\theta$  range of  $5\text{--}60^\circ$ . Particle size distribution of  $\text{MoS}_2(\text{L})$  and  $\text{S-MoS}_2(\text{L})$  was measured by a nano measurer software from SEM images. The BET surface area and porosity of all fillers were carried out by a QUADRASORB SI surface area and porosity analyzer (Quantachrome, USA) at 77 K. The  $\text{CO}_2$  adsorption isotherms were measured using an NOVA 1000e sorption analyzer (Quantachrome, USA) at 298 K. Electron paramagnetic resonance (EPR) spectra was applied by Bruker A300 (Bruker, Germany) to detects S vacancies in materials. Zeta potentials patterns of samples were recorded using a Nexis GD-2030 (Malvern Instruments, UK). Thermogravimetric analysis (TGA) was performed by a STA 449 F3 thermogravimetric analyzer (Netzsch, Germany) with a heating rate of  $10^\circ \text{C min}^{-1}$  in temperature range of  $50\text{--}700^\circ \text{C}$  under  $\text{N}_2$  atmosphere.

## **S2.6. Gas permeation experiments**

The gas permeation properties of membranes were determined using the laboratory-made equipment described in the literature,<sup>4</sup> and measured using the constant pressure/variable volume method as reported in our article.<sup>5</sup> Test conditions and procedures can be detailed in our article.<sup>6</sup> The effective area of the membrane used in the test cell was about  $12.56 \text{ cm}^2$ .  $\text{H}_2$  was used as the sweep gas and kept at atmospheric pressure.  $\text{CO}_2/\text{N}_2$  mixed gas ( $\text{CO}_2/\text{N}_2=15/85$  vol%) and pure  $\text{CO}_2$  and  $\text{N}_2$  (99.999%) were applied as a feed gas. To understand the gas separation performance of PVAm/S- $\text{MoS}_2(\text{L})$  in the acidic environment, we injected  $\text{H}_2\text{SO}_4$  into the humidifier to simulate the flue gas environment, where sulfuric acid solution of different pH values was controlled by adding an amount of  $0.01 \text{ mol L}^{-1} \text{ H}_2\text{SO}_4$  and the pH was

measured with pH paper. The flow rate of permeate gas was measured using a soap bubble flowmeter, of which the compositions were analyzed using a gas chromatograph (Shimadzu, GC-2014C, Japan) equipped with a thermal conductivity detector. Permeance is used to evaluate the permeance performance of mixed matrix composite membranes, which is equal to the quotient of volumetric flow rate divided by the transmembrane-pressure difference and membrane area. Permeance involves the effect of film thickness, which can directly reflect the actual permeability of the membrane <sup>7</sup>. The permeance of each gas is calculated using Eq. (4):

$$R_i = \frac{Q_i}{\Delta P_i \cdot A} \quad \#(4)$$

where,  $R_i$  is the permeance of the gas 'i' (GPU, 1 GPU =  $10^{-6} \text{ cm}^3 \text{ (STP) cm}^{-2} \text{ s}^{-1} \text{ cmHg}^{-1}$ ).  $Q_i$  is the volumetric flow rate of the gas 'i' ( $\text{cm}^3 \text{ (STP) s}^{-1}$ );  $\Delta P_i$  is the transmembrane-pressure difference (cmHg) of the gas 'i', and  $A$  is the effective membrane area ( $\text{cm}^2$ ). The ideal selectivity ( $\alpha_{ij}$ ) of the pure gas is calculated using Eq. (5):

$$\alpha_{ij} = \frac{R_i}{R_j} \quad \#(5)$$

The mixed-gas separation selectivity of gases 'i and j' ( $\alpha_{ij}^*$ ) is calculated using Eq. (6):

$$\alpha_{ij}^* = \frac{y_i/y_j}{x_i/x_j} \quad \#(6)$$

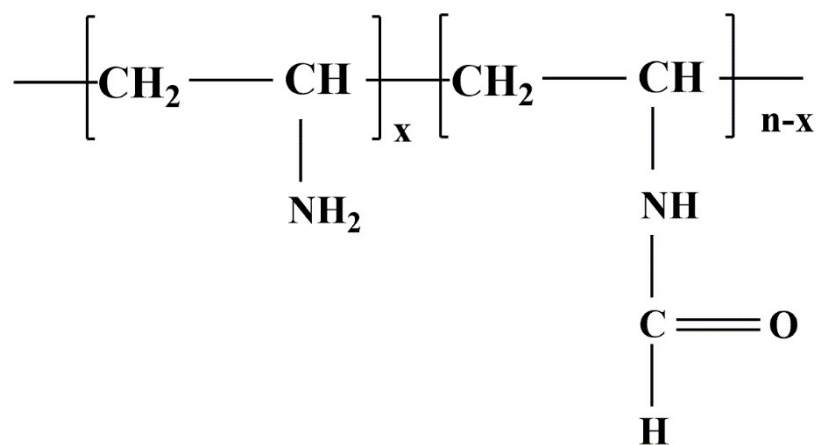

**Fig. S1.** Chemical structure of PVAm.

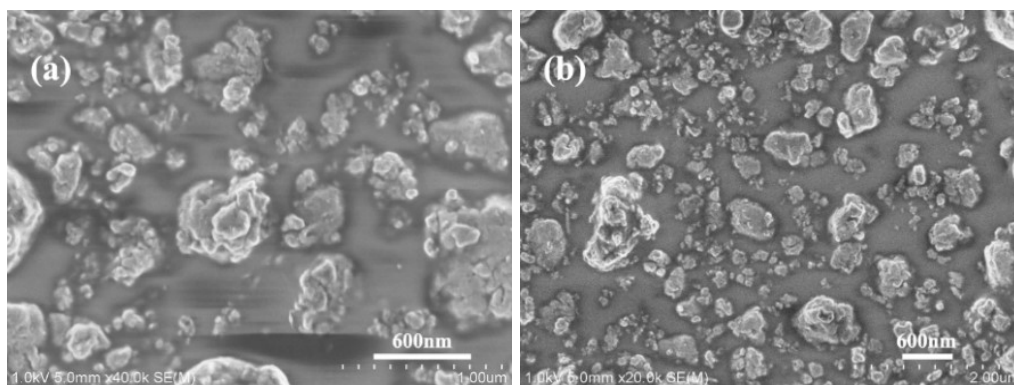

**Fig. S2.** SEM images of (a, b) S-MoS<sub>2</sub>(L) with high magnification.



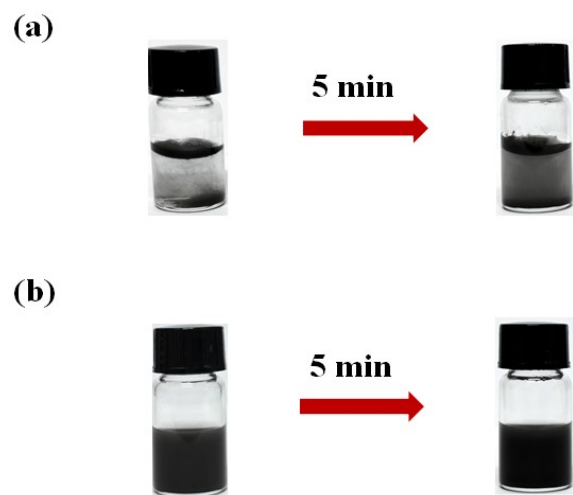

**Fig. S3.** The optical photograph of the dispersibility of (a)  $\text{MoS}_2(\text{L})$  and (b) S- $\text{MoS}_2(\text{L})$ .

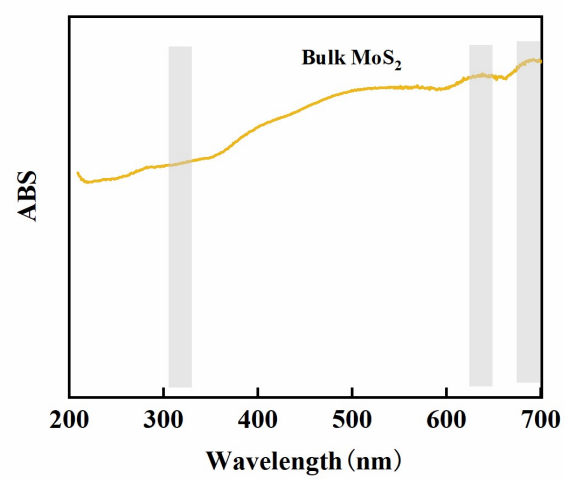

**Fig. S4.** UV-vis adsorption spectra of 2H-MoS<sub>2</sub>.

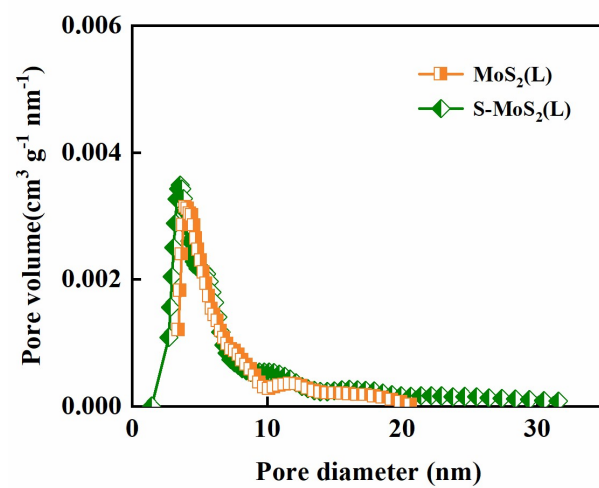

**Fig. S5.** Pore size distribution of MoS<sub>2</sub>(L) and S-MoS<sub>2</sub>(L).

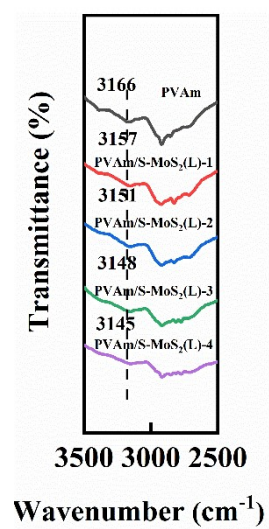

**Fig. S6.** The partially magnified ATR-FTIR spectra of the pristine PVAm membrane and PVAm/S-MoS<sub>2</sub>(L).

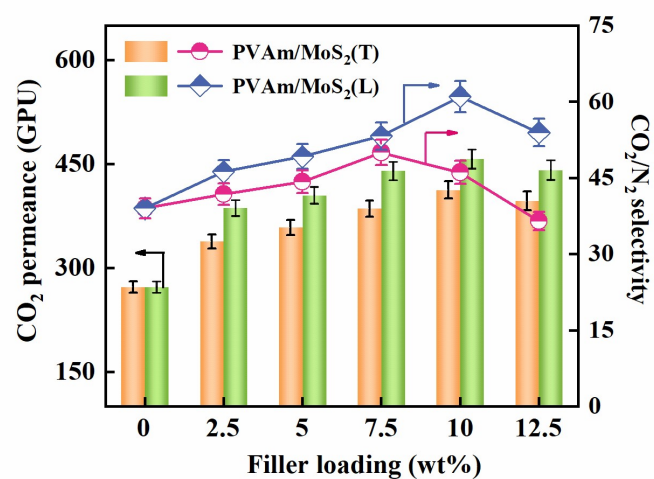

**Fig. S7.** Effects of MoS<sub>2</sub> synthesized by different sulfur source on CO<sub>2</sub> permeance and CO<sub>2</sub>/N<sub>2</sub> selectivity of MMCMs (Temperature: 25 °C; feed gas pressure: 1 bar; relative humidity: 100%; pH value: 7).

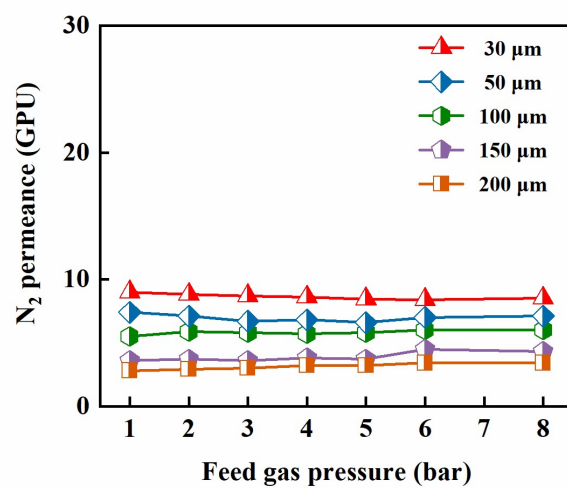

**Fig. S8.** The effect of the wet film thickness of the selective layer on N<sub>2</sub> permeance of MMCMs (Temperature: 25 °C; relative humidity: 100%; pH value: 7).

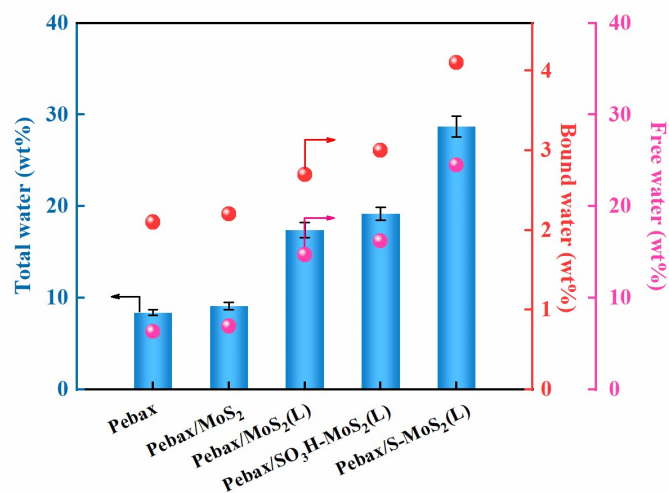

**Fig. S9.** The content of total water, free water and bound water of the pristine Pebax membrane and Pebax-based MMMs doped with different fillers.

**Table S1.** Porous structure parameters of MoS<sub>2</sub>(L) and S-MoS<sub>2</sub>(L).

| Samples                | BET surface<br>area<br>(m <sup>2</sup> g <sup>-1</sup> ) | Total pore<br>volume<br>(cm <sup>3</sup> g <sup>-1</sup> ) | Average pore<br>diameter<br>(nm) |
|------------------------|----------------------------------------------------------|------------------------------------------------------------|----------------------------------|
| MoS <sub>2</sub> (L)   | 10.6                                                     | 0.011                                                      | 4.57                             |
| S-MoS <sub>2</sub> (L) | 13.9                                                     | 0.016                                                      | 5.53                             |



**Table S2.** Thermogravimetric characteristic parameters of the membranes.

| Membranes                     | First weight loss stage (°C) | Second weight loss stage (°C) | $T_{\text{onset}}$ (°C) | $T_{\text{max}}^{\text{a}}$ (°C) | $T_{\text{max}}^{\text{b}}$ (°C) | $T_{\text{d5}}$ (°C) |
|-------------------------------|------------------------------|-------------------------------|-------------------------|----------------------------------|----------------------------------|----------------------|
| PVAm                          | 164–290                      | 290–532                       | 181                     | 235                              | 337                              | 169                  |
| PVAm/S-MoS <sub>2</sub> (L)-1 | 166–293                      | 293–536                       | 180                     | 232                              | 383                              | 182                  |
| PVAm/S-MoS <sub>2</sub> (L)-3 | 168–289                      | 289–541                       | 179                     | 231                              | 340                              | 193                  |
| PVAm/S-MoS <sub>2</sub> (L)-4 | 163–280                      | 280–524                       | 164                     | 229                              | 350                              | 185                  |

Note:  $T_{\text{onset}}$  is the temperature of intersection point between tangent and baseline,  $T_{\text{max}}^{\text{a}}$  is the temperature at which the rate of weight loss reaches a maximum in the first weight loss stage,  $T_{\text{max}}^{\text{b}}$  is the temperature at which the rate of weight loss reaches a maximum in the second weight loss stage;  $T_{\text{d5}}$  is the temperature, when the weight loss of the sample reaches 5%.

**Table S3.** The content of total water, free water and bound water of the pristine Pebax membrane and MMMs doped with different fillers.

| Membranes                                    | Total water ( $W_t$ , %) | Free water ( $W_f$ , %) | Bound water ( $W_b$ , %) |
|----------------------------------------------|--------------------------|-------------------------|--------------------------|
| Pebax                                        | 8.4                      | 6.3                     | 2.1                      |
| Pebax/MoS <sub>2</sub>                       | 9.1                      | 6.9                     | 2.2                      |
| Pebax/MoS <sub>2</sub> (L)                   | 17.4                     | 14.7                    | 2.7                      |
| Pebax/SO <sub>3</sub> H-MoS <sub>2</sub> (L) | 19.2                     | 16.2                    | 3.0                      |
| Pebax/S-MoS <sub>2</sub> (L)                 | 28.7                     | 24.6                    | 4.1                      |

**Table S4.** Comparison of CO<sub>2</sub>/N<sub>2</sub> separation performance with previously reported PVAm-based MMCMs.

| Membranes                                  | Thickness (μm) | Mixed matrix membranes          |                                       |                                             | Pristine membrane               |                                       |                                             | Enhancement                   |                                                 | Test conditions                                              | Ref. |
|--------------------------------------------|----------------|---------------------------------|---------------------------------------|---------------------------------------------|---------------------------------|---------------------------------------|---------------------------------------------|-------------------------------|-------------------------------------------------|--------------------------------------------------------------|------|
|                                            |                | CO <sub>2</sub> permeance (GPU) | CO <sub>2</sub> permeability (Barrer) | CO <sub>2</sub> /N <sub>2</sub> selectivity | CO <sub>2</sub> permeance (GPU) | CO <sub>2</sub> permeability (Barrer) | CO <sub>2</sub> /N <sub>2</sub> selectivity | CO <sub>2</sub> permeance (%) | CO <sub>2</sub> /N <sub>2</sub> selectivity (%) |                                                              |      |
| PVAm/MK                                    | 2.37           | 188                             | 443                                   | 78                                          | 74                              | 196                                   | 42                                          | 154                           | 85.7                                            | Pure gas<br>1 bar, 25 °C                                     | 4    |
| CS-PVAm/HPEI-GO                            | 3.5            | 36                              | 108.5                                 | 107                                         | 14                              | 31.5                                  | 76                                          | 157.1                         | 40.7                                            | CO <sub>2</sub> /N <sub>2</sub> (10/90 vol%)<br>1 bar, 25 °C | 8    |
| PVAm/PANI@CNTs-GO                          | 0.73           | 170                             | 124.1                                 | 122.4                                       | 73                              | 53.3                                  | 45.3                                        | 132.9                         | 170.2                                           | Pure gas<br>1 bar, 25 °C                                     | 5    |
| PVAm/COF <sub>p</sub>                      | 0.15           | 1789                            | 268.3                                 | 89                                          | 1400                            | 210                                   | 54                                          | 27.8                          | 64.8                                            | Pure gas<br>5 bar, 25 °C                                     | 1    |
| PVAm/MWCNTs                                | ~0.25          | 195                             | 49                                    | 39                                          | 132                             | 33                                    | 37.7                                        | 47.7                          | 3.4                                             | Pure gas<br>1.1 bar, 25 °C                                   | 9    |
| PVAm/SiO <sub>2</sub> -NH <sub>2</sub> /PS | ~0.25          | 229                             | 57.2                                  | 45.8                                        | 132                             | 33                                    | 37.7                                        | 73.5                          | 21.5                                            | Pure gas<br>1.1 bar, 25 °C                                   | 9    |
| PVAm/MWCNT-NH <sub>2</sub>                 | ~0.28          | 174                             | 48.7                                  | 74                                          | 89                              | 40                                    | 60                                          | 95.5                          | 23.3                                            | Pure gas<br>1.1 bar, 25 °C                                   | 9    |
| PVAm/ZSM-5-NH <sub>2</sub> /PS             | ~0.25          | 205                             | 51.1                                  | 42.7                                        | 132                             | 33                                    | 37.7                                        | 55.3                          | 13.4                                            | Pure gas<br>1.1bar, 25 °C                                    | 9    |
| PVAm/ZIF-8-d-MK                            | 1.85           | 169                             | 312                                   | 86.7                                        | 76                              | 144.4                                 | 42                                          | 122                           | 106                                             | Pure gas<br>1 bar, 25 °C                                     | 10   |
| PVAm/HT                                    | 0.25           | 3187                            | 796.75                                | 296                                         | 419                             | 104.7                                 | 68.8                                        | 660.0                         | 330.2                                           | CO <sub>2</sub> /N <sub>2</sub> (15/85 vol%)<br>1 bar, 25 °C | 11   |

| Membranes                   | Thickness ( $\mu\text{m}$ ) | Mixed matrix membranes          |                                       |                                             | Pristine membrane               |                                       |                                             | Enhancement                   |                                                 | Test condition                                                 | Ref.      |
|-----------------------------|-----------------------------|---------------------------------|---------------------------------------|---------------------------------------------|---------------------------------|---------------------------------------|---------------------------------------------|-------------------------------|-------------------------------------------------|----------------------------------------------------------------|-----------|
|                             |                             | CO <sub>2</sub> permeance (GPU) | CO <sub>2</sub> permeability (Barrer) | CO <sub>2</sub> /N <sub>2</sub> selectivity | CO <sub>2</sub> permeance (GPU) | CO <sub>2</sub> permeability (Barrer) | CO <sub>2</sub> /N <sub>2</sub> selectivity | CO <sub>2</sub> permeance (%) | CO <sub>2</sub> /N <sub>2</sub> selectivity (%) |                                                                |           |
| PVAm/PANI NS                | 0.28                        | 1200                            | 336                                   | 120                                         | 26                              | 35.3                                  | 50.6                                        | 852                           | 137                                             | CO <sub>2</sub> /N <sub>2</sub> (20/80 vol%)<br>1.1 bar, 25 °C | 12        |
| PVAm/ASU-1                  | 1.2                         | 721                             | 865.2                                 | 71.33                                       | 380                             | 456                                   | 20                                          | 89.7                          | 256.6                                           | CO <sub>2</sub> /N <sub>2</sub> (15/85 vol%)<br>1.5bar, 25 °C  | 13        |
| PVA/PE/ZIF-8                | 4                           | 82                              | 328                                   | 370                                         | 45                              | 180                                   | 210                                         | 82.2                          | 76.2                                            | CO <sub>2</sub> /N <sub>2</sub> (20/80 vol%)<br>2.5 bar, 95 °C | 14        |
| PVAm/S-MoS <sub>2</sub> (L) | 0.326                       | 554                             | 181                                   | 74                                          | 272                             | 64                                    | 39                                          | 104                           | 90                                              | Pure gas<br>1 bar, 25 °C                                       | This work |

**Table S5.** Comparison of CO<sub>2</sub>/N<sub>2</sub> separation performance with previously reported MMMs embedded with lamellar fillers.

| Membranes                             | Thickness (μm) | Mixed matrix membranes          |                                       |                                             | Pristine membrane               |                                       |                                             | Enhancement                   |                                                 | Test conditions                                             | Ref. |
|---------------------------------------|----------------|---------------------------------|---------------------------------------|---------------------------------------------|---------------------------------|---------------------------------------|---------------------------------------------|-------------------------------|-------------------------------------------------|-------------------------------------------------------------|------|
|                                       |                | CO <sub>2</sub> permeance (GPU) | CO <sub>2</sub> permeability (Barrer) | CO <sub>2</sub> /N <sub>2</sub> selectivity | CO <sub>2</sub> permeance (GPU) | CO <sub>2</sub> permeability (Barrer) | CO <sub>2</sub> /N <sub>2</sub> selectivity | CO <sub>2</sub> permeance (%) | CO <sub>2</sub> /N <sub>2</sub> selectivity (%) |                                                             |      |
| Pebax/COF-5                           | 60             | ---                             | 493                                   | 49.3                                        | ---                             | 98                                    | 31.3                                        | 403                           | 57.5                                            | Pure gas<br>1 bar, 30 °C                                    | 15   |
| Pebax/ZIF-67 NS                       | 77             | ---                             | 139.4                                 | 73.2                                        | ---                             | 92.5                                  | 41.6                                        | 50.7                          | 75.9                                            | Pure gas<br>1 bar, 25 °C                                    | 16   |
| Pebax/Cys-MoS <sub>2</sub>            | 40             | ---                             | 297                                   | 120                                         | ---                             | 97                                    | 53.4                                        | 206                           | 124.7                                           | Pure gas<br>5 bar, 25 °C                                    | 17   |
| Pebax-2.5-CuBDC-ns@10MoS <sub>2</sub> |                | ---                             | 123                                   | 69                                          | ---                             | 86.3                                  | 38.3                                        | 42.5                          | 80.1                                            | Pure gas<br>4 bar, 35 °C                                    | 18   |
| Pebax/0.25DCN-4/PAN                   | 1.84           | 33.3                            | 61.2                                  | 67.2                                        | 29                              | 53.4                                  | 35                                          | 14.6                          | 92                                              | Pure gas<br>3 bar, 25 °C                                    | 19   |
| Pebax/Mxene-10                        | 2              | ---                             | 584                                   | 59                                          | ---                             | 210                                   | 38                                          | 178                           | 55.3                                            | Pure gas<br>2bar, 30 °C                                     | 20   |
| Pebax/PRG                             | 5.25           | ---                             | 119                                   | 104                                         | ---                             | 60                                    | 56                                          | 98.3                          | 85.7                                            | Pure gas<br>2bar, 30 °C                                     | 21   |
| Pebax-PCN-10                          | 65             | ---                             | 613.4                                 | 60.89                                       | ---                             | 301.9                                 | 53.8                                        | 103                           | 13                                              | CO <sub>2</sub> /N <sub>2</sub> (10/90 vol%)<br>1bar, 25 °C | 22   |
| 0.5wt%MCN/Pebax                       | 50             | ---                             | 123                                   | 76                                          | ---                             | 80.3                                  | 59                                          | 53                            | 28.8                                            | Pure gas<br>4 bar, 25 °C                                    | 23   |
| Pebax/ZIF-8@BNNS                      | 80             | ---                             | 106.5                                 | 83.2                                        | ---                             | 80.97                                 | 47.9                                        | 31.5                          | 73.7                                            | Pure gas<br>3 bar, 30 °C                                    | 24   |

| Membranes                        | Thickness ( $\mu\text{m}$ ) | Mixed matrix membranes          |                                       |                                             | Pristine membrane               |                                       |                                             | Enhancement                   |                                                 | Test condition                                               | Ref.      |
|----------------------------------|-----------------------------|---------------------------------|---------------------------------------|---------------------------------------------|---------------------------------|---------------------------------------|---------------------------------------------|-------------------------------|-------------------------------------------------|--------------------------------------------------------------|-----------|
|                                  |                             | CO <sub>2</sub> permeance (GPU) | CO <sub>2</sub> permeability (Barrer) | CO <sub>2</sub> /N <sub>2</sub> selectivity | CO <sub>2</sub> permeance (GPU) | CO <sub>2</sub> permeability (Barrer) | CO <sub>2</sub> /N <sub>2</sub> selectivity | CO <sub>2</sub> permeance (%) | CO <sub>2</sub> /N <sub>2</sub> selectivity (%) |                                                              |           |
| SHPAA/PVA/PGO/PVDF               | 0.185                       | 607                             | 112.3                                 | 36                                          | 383                             | 70.8                                  | 55                                          | 58.5                          | -34.5                                           | CO <sub>2</sub> /N <sub>2</sub> (10/90 vol%)<br>1 bar, 35 °C | 25        |
| Pebax/TpPa-1-nc/PVDF             | 2.6                         | 7.4                             | 19.2                                  | 64                                          | 4.5                             | 11.7                                  | 41                                          | 64.1                          | 56.1                                            | Pure gas<br>3 bar, 25 °C                                     | 26        |
| MoS <sub>2</sub> /Pebax/PDMS/PSf | 3.71                        | ---                             | 67                                    | 90                                          | ---                             | 38.8                                  | 44                                          | 72                            | 104                                             | Pure gas<br>2bar, 30 °C                                      | 27        |
| Pebax/5MoS <sub>2</sub>          | 3.71                        | ---                             | 67                                    | 91                                          | ---                             | 46                                    | 45                                          | 45                            | 102                                             | Pure gas<br>2bar, 30 °C                                      | 28        |
| Pebax/A-rGO                      | 2.98                        | ---                             | 65.2                                  | 95.9                                        | ---                             | 58                                    | 41.1                                        | 12.4                          | 133                                             | Pure gas<br>4bar, 25 °C                                      | 29        |
| AMT/PSf                          | 0.098                       | 830                             | 81.2                                  | 120                                         | ---                             | ---                                   | ---                                         | ---                           | ---                                             | CO <sub>2</sub> /N <sub>2</sub> (15/85 vol%)<br>3 bar, 50 °C | 30        |
| PVAm/S-MoS <sub>2</sub> (L)      | 0.326                       | 554                             | 181                                   | 74                                          | 272                             | 64                                    | 39                                          | 104                           | 90                                              | Pure gas<br>1 bar, 25 °C                                     | This work |

**Table S6.** Comparison of the long-term stability of PVAm/S-MoS<sub>2</sub>(L) with previously reported MMMs.

| Membranes                        | Test conditions                                                | CO <sub>2</sub> permeance (GPU) | CO <sub>2</sub> /N <sub>2</sub> selectivity | Testing time (hour) | Ref.      |
|----------------------------------|----------------------------------------------------------------|---------------------------------|---------------------------------------------|---------------------|-----------|
| PVAm/PANI-c                      | CO <sub>2</sub> /N <sub>2</sub> (20/80 vol%)<br>3 bar, 25 °C   | 492                             | 71                                          | 300                 | 12        |
| VA-co-VAm/MWCNTs-NH <sub>2</sub> | CO <sub>2</sub> /N <sub>2</sub> (20/80 vol%)<br>5.4 bar, 28 °C | 110                             | 70                                          | 110                 | 31        |
| PVAm/PEG-UIO-66-NH <sub>2</sub>  | CO <sub>2</sub> /N <sub>2</sub> (15/85 vol%)<br>3 bar, 25 °C   | 1263                            | 91                                          | 100                 | 32        |
| SHPAA-PVA/MFC-PEG4               | CO <sub>2</sub> /N <sub>2</sub> (10/90 vol%)<br>1.7 bar, 25 °C | 652                             | 41                                          | 175                 | 33        |
| PVAm/EDA                         | CO <sub>2</sub> /N <sub>2</sub> (20/80 vol%)<br>1.5 bar, 22 °C | 530                             | 110                                         | 300                 | 34        |
| PVAm/ZIF-8-d-MK                  | CO <sub>2</sub> /N <sub>2</sub> (15/85 vol%)<br>1 bar, 25 °C   | 168.6                           | 86.7                                        | 360                 | 10        |
| PVAm/PANI@CNTs-GO                | CO <sub>2</sub> /N <sub>2</sub> (15/85 vol%)<br>1 bar, 25 °C   | 172.1                           | 122.4                                       | 360                 | 5         |
| PVAm/MK                          | CO <sub>2</sub> /N <sub>2</sub> (15/85 vol%)<br>1 bar, 25 °C   | 150                             | 78                                          | 360                 | 4         |
| PVA/ProK-40                      | CO <sub>2</sub> /N <sub>2</sub> (10/90 vol%)<br>2 bar, 25 °C   | 790                             | 39                                          | 18.5                | 35        |
| Cs-PVAm/HPEI-GO                  | CO <sub>2</sub> /N <sub>2</sub> (10/90 vol%)<br>1 bar, 25 °C   | 31.5                            | 106                                         | 100                 | 8         |
| SHPAA/PVA/PGO                    | CO <sub>2</sub> /N <sub>2</sub> (10/90 vol%)<br>1 bar, 35 °C   | 607                             | 36                                          | 14                  | 25        |
| PVAm/ZIF-8@NENP-NH <sub>2</sub>  | CO <sub>2</sub> /N <sub>2</sub> (15/85 vol%)<br>1 bar, 25 °C   | 301                             | 91                                          | 360                 | 36        |
| PVAm/S-MoS <sub>2</sub> (L)      | CO <sub>2</sub> /N <sub>2</sub> (15/85 vol%)<br>1 bar, 25 °C   | 680                             | 82                                          | 360                 | This work |

## References

1. X. C. Cao, Z. Wang, Z. H. Qao, S. Zhao and J. X. Wang, *ACS Appl. Mat. Interfaces*, 2019, **11**, 5306-5315.
2. Y. F. Li, Q. P. Xin, H. Wu, R. L. Guo, Z. Z. Tian, Y. Liu, S. F. Wang, G. W. He, F. S. Pan and Z. Y. Jiang, *Energy Environ. Sci.*, 2014, **7**.
3. L. Liu, A. Chakma and X. S. Feng, *J. Membr. Sci.*, 2008, **310**, 66-75.
4. Y. H. Wang, L. Li, X. R. Zhang, J. P. Li, J. J. Wang and N. W. Li, *J. Membr. Sci.*, 2020, **599**, 117828.
5. Y. H. Wang, L. Li, X. R. Zhang, J. P. Li, C. C. Liu, N. W. Li and Z. L. Xie, *J. Membr. Sci.*, 2019, **589**, 117246.
6. Y. H. Wang, X. Bai, X. R. Zhang and J. P. Li, *J. Membr. Sci.*, 2023, **677**, 121609.
7. S. H. Choi, M. S. Qahtani and E. A. Qasem, *J. Membr. Sci.*, 2018, **553**, 180-188.
8. Y. J. Shen, H. X. Wang, J. D. Liu and Y. T. Zhang, *ACS Sustain. Chem. Eng.*, 2015, **3**, 1819-1829.
9. M. Wang, Z. Wang, N. Li, J. Y. Liao, S. Zhao, J. X. Wang and S. C. Wang, *J. Membr. Sci.*, 2015, **495**, 252-268.
10. Y. H. Wang, J. J. Wang, X. R. Zhang, J. P. Li and L. Li, *Sep. Purif. Technol.*, 2021, **270**, 118800.
11. J. Y. Liao, Z. Wang, C. Y. Gao, M. Wang, K. Yan, X. M. Xie, S. Zhao, J. X. Wang and S. C. Wang, *J. Mater. Chem. A*, 2015, **3**, 16746-16761.
12. J. Zhao, Z. Wang, J. X. Wang and S. C. Wang, *J. Membr. Sci.*, 2012, **403**, 203-215.
13. Z. H. Qiao, Z. Wang, S. J. Yuan, J. X. Wang and S. C. Wang, *J. Membr. Sci.*, 2015, **475**, 290-302.
14. M. Barooah and B. Mandal, *J. Membr. Sci.*, 2019, **572**, 198-209.
15. K. Duan, J. Wang, Y. T. Zhang and J. D. Liu, *J. Membr. Sci.*, 2019, **572**, 588-595.
16. S. Feng, M. Q. Bu, J. Pang, W. D. Fan, L. L. Fan, H. R. Zhao, G. Yang, H. L. Guo, G. D. Kong, H. X. Sun, Z. X. Kang and D. F. Sun, *J. Membr. Sci.*, 2020, **593**, 117404.



17. Y. H. Wang, Z. Jin, X. R. Zhang and J. P. Li, *Sep. Purif. Technol.*, 2022, **297**, 121560.
18. N. Liu, J. Cheng, W. Hou, C. Yang, X. Yang and J. H. Zhou, *Sep. Purif. Technol.*, 2022, **282**, 120007.
19. L. Cheng, Y. Y. Song, H. M. Chen, G. Z. Liu, G. P. Liu and W. Q. Jin, *Sep. Purif. Technol.*, 2020, **250**, 117200.
20. G. Z. Liu, L. Cheng, G. N. Chen, F. Liang, G. P. Liu and W. Q. Jin, *Chem. Asian J.*, 2020, **15**, 2364-2370.
21. G. Y. Dong, J. W. Hou, J. Wang, Y. T. Zhang, V. Chen and J. D. Liu, *J. Membr. Sci.*, 2016, **520**, 860-868.
22. J. P. Hou, X. Q. Li, R. L. Guo, J. S. Zhang and Z. M. Wang, *Nanotechnology*, 2018, **29**, 125706.
23. X. C. Yang, W. J. Zheng, Y. Xi, W. X. Guan, X. M. Yan, X. H. Ruan, C. H. Ma, Y. Dai and G. H. He, *J. Membr. Sci.*, 2021, **624**, 119046.
24. F. Guo, W. Xiao, C. H. Ma, X. H. Ruan, G. H. He, H. L. Wang, Z. D. Yang and X. B. Jiang, *Membranes-Basel*, 2023, **13**, 444.
25. S. Janakiram, J. L. M. Espejo, X. Y. Yu, L. Ansaloni and L. Y. Deng, *J. Membr. Sci.*, 2020, **616**, 118626.
26. C. C. Zou, Q. Q. Li, Y. Y. Hua, B. H. Zhou, J. G. Duan and W. Q. Jin, *ACS Appl. Mat. Interfaces*, 2017, **9**, 29093-29100.
27. Y. J. Shen, H. X. Wang, X. Zhang and Y. T. Zhang, *ACS Appl. Mat. Interfaces*, 2016, **8**, 23371-23378.
28. Y. C. Liu, C. Y. Chen, G. S. Lin, C. H. Chen, K. C. W. Wu, C. H. Lin and K. L. Tung, *J. Membr. Sci.*, 2019, **582**, 358-366.
29. G. Krishnan, S. S. Mohtar, F. Aziz, J. Jaafar, N. Yusof, W. N. W. Salleh and A. F. Ismail, *Korean J. Chem. Eng.*, 2020, **37**, 2287-2294.
30. Z. H. Qiao, S. Zhao, J. X. Wang, S. C. Wang, Z. Wang and M. D. Guiver, *Angew. Chem. Int. Edit.*, 2016, **55**, 9321-9325.

31. B. B. Zhang, J. W. Fu, Q. F. Zhang, C. H. Yi and B. L. Yang, *J. Appl. Polym. Sci.*, 2019, **136**.
32. R. Xu, Z. Wang, M. Wang, Z. H. Qiao and J. X. Wang, *J. Membr. Sci.*, 2019, **573**, 455-464.
33. S. Janakiram, X. Y. Yu, L. Ansaloni, Z. D. Dai and L. Y. Deng, *ACS Appl. Mat. Interfaces*, 2019, **11**, 33302-33313.
34. S. J. Yuan, Z. Wang, Z. H. Qiao, M. M. Wang, J. X. Wang and S. C. Wang, *J. Membr. Sci.*, 2011, **378**, 425-437.
35. Z. D. Dai, J. Deng, L. Ansaloni, S. Janakiram and L. Y. Deng, *J. Membr. Sci.*, 2019, **578**, 61-68.
36. X. R. Zhang, X. F. Ren, Y. H. Wang and J. P. Li, *Sep. Purif. Technol.*, 2022, **303**, 122195.
